# Supplementary material for: Use and Evaluation of Computerized Clinical Decision Support Systems for Early Detection of Sepsis in Hospitals: Protocol for a Scoping Review
Source: PubMed Central journal article supplement (PMC7718090; doi:10.2196/24899), 2020-11-20
Supplement: resprot_v9i11e24899_app1.pdf [file resprot_v9i11e24899_app1.pdf]

## MEDLINE Search Strategy

1. sepsis/ or neonatal sepsis/ or shock, septic/ or systemic inflammatory response syndrome/
2. ("systemic inflammatory response syndrome" or sepsi\* or SIRS or sepsi\* or "septic shock").ti,ab.
3. 1 or 2
4. decision making, computer-assisted/ or diagnosis, computer-assisted/ or medical records systems, computerized/ or electronic health records/ or medical informatics/ or medical informatics applications/ or hospital information systems/ or Decision Support Systems, Management/ or Therapy, Computer-Assisted/ or telemedicine/ or telepathology/ or internet-based intervention/ or communications media/ or computers, handheld/ or smartphone/ or mobile applications/ or cell phone/ or text messaging/ or decision support systems, clinical/ or health information systems/ or Software/ or algorithms/ or electronics/ or electronics, medical/ or Automation/ or decision support techniques/ or clinical decision-making/ or clinical alarms/ or clinical decision rules/ or Point-of-Care Systems/ or biomedical technology/
5. ("health information systems" or CDS or CDSS or "knowledge-based" or "rule-based" or EHR or eHealth\* or mHealth\* or "mobile phone\*" or "cell phone\*" or "smart phone\*" or software or algorithm or electronic or automat\* or digital or computer\* or computer-aided or computer-assisted or "clinic\* decision support" or "best practice alert\*" or "database query" or "clinical alert\*" or "clinical alarm\*" or "decision support").ti,ab.
6. exp artificial intelligence/ or exp machine learning/ or exp deep learning/ or exp support vector machine/ or exp neural networks, computer/
7. (artificial intelligence or deep learning or machine learning or support vector machine).ti,ab.
8. 6 or 7
9. 4 or 5
10. (screening or diagnos\* or detect\* or recog\* or alert or alarm or triag\* or identif\* or surveillance or prognosis or "early warning system" or monitor\* or warn\* or tool).ti,ab.
11. diagnosis/ or early diagnosis/ or prognosis/ or Monitoring, Physiologic/
12. 10 or 11
13. 3 and 9 and 12
14. 13 not 8
15. exp animals/ not humans.sh.
16. 14 not 15
17. Limit 16 to english language
